# Supplementary material
Source: PubMed Central journal article supplement (PMC4084424)
Supplement: 1406722111_pnas.201406722SI.pdf [file 1406722111_pnas.201406722SI.pdf]

# Supporting Information

Bhadury et al. 10.1073/pnas.1406722111

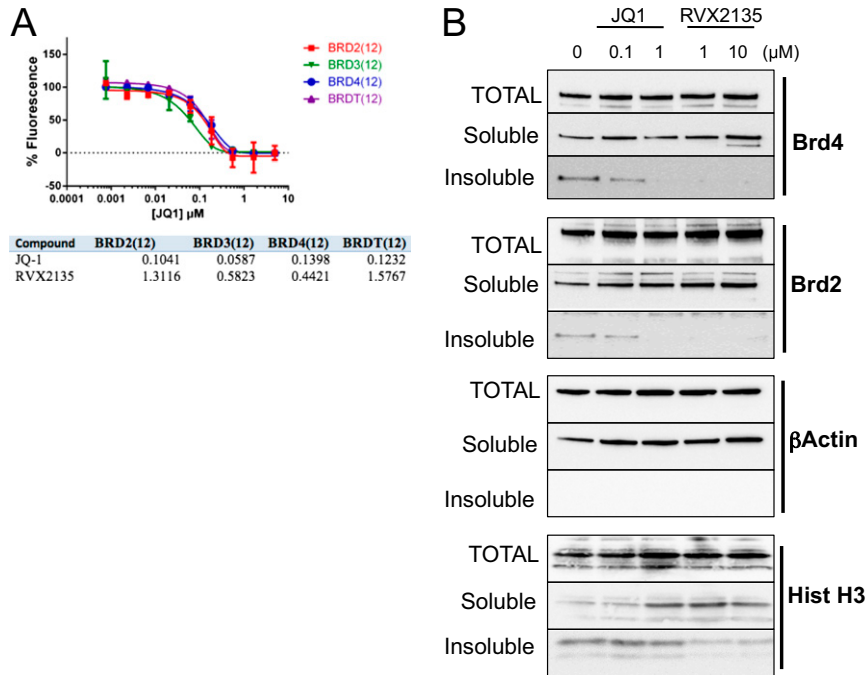

**Fig. S1.** Bromodomain and extraterminal inhibitors (BETi) displace BET proteins from acetylated histones in chromatin. (A) The same assay as in Fig. 1 was used to determine the  $IC_{50}$  of the prototype BETi JQ1.  $IC_{50}$  values ( $\mu M$ ) for both BETi are shown in the table beneath the dose–response curve. Data are mean values  $\pm$  SD (error bars). (B) BETi displace Brd2 and Brd4 from chromatin in  $\lambda 820$  cells. Cells were cultured in the presence of BETi or vehicle (DMSO) for 24 h. Cells were counted and an equal number of cells was pelleted in two different tubes per treatment. Five of the pellets (one per treatment) were used to make a total lysate, where the pellet was dislodged and then resuspended in a standard Western blot lysis buffer, sonicated with a tip sonicator, and boiled in SDS loading dye before being loaded on a gel. The remaining five pellets from the experiment were lysed on ice in a standard lysis buffer for Western blot and mildly sonicated using a Bioruptor (Diagenode). The lysates were centrifuged ( $5,000 \times g$ ) and the supernatant (soluble fraction) was saved and processed for Western blot analysis. The remaining pellets contained cell debris and chromatin and were further processed in a stronger lysis buffer containing urea and sonicated using a tip sonicator. This highly viscous fraction (insoluble fraction) was processed for Western blot. All of the three fractions (total, soluble, and insoluble) were run on an SDS/PAGE gel, transferred to a nitrocellulose membrane, and probed for the indicated proteins. Actin served as a control for the soluble and total fractions, whereas Histone H3 was present in all fractions.













A

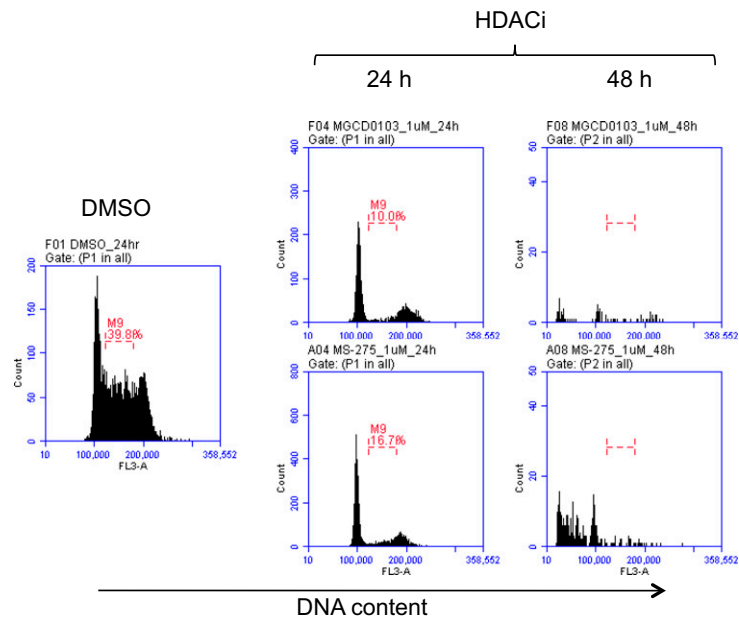

B

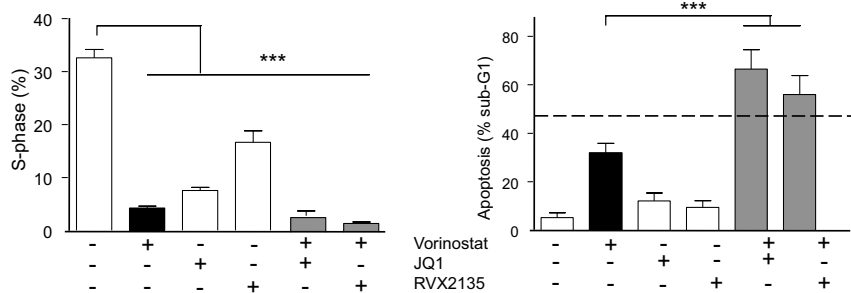

**Fig. S10.** (A)  $\lambda$ 820 cells were treated with HDAC inhibitors MGCD0103 and MS-275 at 1  $\mu$ M for 24 and 48 h. Shown are DNA histograms at concentrations where the cells arrested at 24 h and succumbed to cell death at 48 h. Graphs are representative of three independent experiments yielding the same results. (B) Quantification of data shown in Fig. 7D.  $\lambda$ 820 cells were cultured in the absence or presence of 1  $\mu$ M vorinostat, 1  $\mu$ M JQ1, and/or 10  $\mu$ M RVX2135 for 24 h. Cell-cycle distribution and apoptosis (sub-G1 DNA content) were determined by flow cytometry of nuclei stained with 7-AAD. Shown are mean values of three independent experiments. Apoptosis levels above the dashed line indicate more than additive levels. Errors bars represent the standard deviation. \*\*\* $P < 0.001$ .

## Other Supporting Information Files

[Dataset S1 \(XLSX\)](#)

[Dataset S2 \(XLSX\)](#)

[Dataset S3 \(XLSX\)](#)

[Dataset S4 \(XLSX\)](#)

[Dataset S5 \(XLSX\)](#)
